# Supplementary material for: A Network-Guided Genetic Approach to Identify Novel Regulators of Adventitious Root Formation in Arabidopsis thaliana
Source: Front Plant Sci. 2019 Apr 12;10:461. doi: 10.3389/fpls.2019.00461 (PMC6478000; doi:10.3389/fpls.2019.00461)
Supplement: Supplementary file 1 [file Table_1.XLSX]

## Sheet: Hoja1
GeneID	2 d CIM	4 d CIM	7 d CIM	4 d + 3 d SIM	4 d + 3 d RIM	1 d CIM	4 d + 6 d SIM	4 d + 6 d RIM	10 d CIM cot	10 d CIM	10 d CIM pet	5 h post-cut	13 h post-cut	22 h post-cut
At1g55370	0.1392	0.6585	0.1263	-0.0238	0.035	0.3633	0.1988	0.7538	-1.4129	-0.2307	0.3047	-0.5044	-1.2466	-1.2558
At4g31390	0.1362	-0.0519	-0.8206	-0.6071	-0.4926	-0.4435	-0.3712	-0.2366	-1.6015	0.0501	-1.3749	0.4953	-0.4641	0.037
At4g09000	-0.5485	-0.5581	-0.5906	-0.6023	-0.0331	-0.1977	-0.1227	-0.2941	-0.0603	-0.5755	-0.2809	0.138	0.5992	0.3115
At3g47640	-0.4231	0.0123	-0.2745	-0.1202	0.1422	0.2208	-0.1375	0.1812	0.4706	0.3282	0.405	0.76	-0.4607	-0.3827
At5g21090	-0.2325	-0.1523	0.1665	0.071	0.3925	0.2823	0.516	0.1663	-0.3364	-0.2585	-0.4243	0.1103	-0.0736	0.2436
At5g52440	0.7427	0.3184	0.2361	0.6396	-0.299	-0.5134	-0.1692	0.1228	-1.9115	0.2007	-0.5986	-1.0643	-1.0919	-1.4025
At3g30180	0.4769	1.6792	1.0676	1.9476	0.7741	1.7172	-0.5604	1.0152	0.3174	-0.4492	-2.6501	0.4909	-0.2232	0.038
At5g35220	0.5129	0.7237	0.6725	0.7064	0.1253	-0.1067	-0.0125	-0.0614	-0.6801	0.4189	0.2765	-0.5236	-0.9703	-1.1939
At2g01450	-0.307	-0.3882	-0.3059	-0.2543	0.2084	-0.1408	0.1102	-0.3465	0.7265	-0.1459	-0.7932	0.2407	-0.07	-0.2904
At2g30810	-0.4095	0.4838	-0.9672	-0.121	-0.7434	-0.3785	-0.9782	-0.1293	-0.415	-0.0485	-0.3479	-0.0375	0.4606	-0.5353
At1g50270	0.1339	0.7294	0.3102	0.2379	0.1296	0.0107	0.0926	-0.1075	1.2464	0.844	1.6382	1.1381	0.9731	0.6279
At1g62430	-0.187	0.0033	-0.4725	-0.031	-0.1553	0.1158	-0.4437	0.2613	-0.4101	0.0639	-0.3092	0.2302	-0.4273	-0.7395
At5g51770	0.3813	0.6032	1.0779	0.8302	0.2256	0.3705	0.3152	0.2466	0.1737	-0.1318	-0.3011	-0.679	-1.0975	-0.5052
At3g46790	-0.1498	0.3405	0.3403	0.0166	0.1373	-0.2834	0.3697	-0.0152	-0.3096	0.0832	0.9107	-0.5098	-1.0605	-0.9265
At5g57690	-0.0111	-0.0355	0.4604	0.6214	-0.455	0.56	0.7953	0.4364	0.4594	-1	-4.0772	1.7872	0.3471	-0.0119
At2g47650	-1.3179	-1.3282	-1.0719	-0.9036	0.0378	0.3326	0.1955	-0.0693	1.2711	-0.0861	1.8829	0.0335	0.694	0.274
At3g22590	0.4781	0.8026	1.1159	1.081	0.5329	0.5179	0.3023	0.4906	0.814	0.5565	1.0777	-0.25	-0.4169	-0.5605
At3g44200	-0.7903	-0.6887	-0.5567	-0.4871	-0.1802	-0.3718	-0.0476	-0.2257	-0.5817	-0.929	-1.729	0.6213	0.3291	0.1881
At4g11120	-0.0282	0.1701	0.2401	0.3959	0.2756	0.2822	0.0549	0.5176	1.678	0.7211	1.8586	-0.3177	-0.2512	-0.1094
At5g61050	2.3353	1.3017	2.4379	2.3551	1.4212	2.2268	0.91	1.1666	0.2647	0.7116	1.0754	0.3024	-1.5657	-1.6856
At4g19570	2.3884	0.9014	0.0534	-1	-0.8036	-1.6471	0.389	-0.6296	-3.5388	0.0431	-0.432	-0.0926	-0.7678	-0.6827
At3g16650	1.283	2.0191	2.2021	1.9582	0.5388	0.2754	1.0537	1.3481	0.8229	1.5711	2.4548	-0.4515	-0.944	-1.158
At4g23060	0.9962	1.7457	1.3129	2.434	0.6741	2.4206	-0.1998	1.0754	0.9417	1.7994	2.4722	-2.7216	-0.3427	-0.6647
At2g19790	0.0394	0.0519	0.4301	0.1272	0.278	-0.0134	0.0386	-0.2652	0.2428	0.1618	0.3662	0.366	0.592	0.4315
At3g62980	0.1453	0.5945	0.0274	0.5011	-0.5981	0.2191	-0.6657	-0.0699	0.1867	0.4461	0.3804	-0.6405	-0.6313	-0.3202
At3g25520	0.495	0.5924	0.6086	0.7225	0.1098	0.2803	-0.0255	0.2703	0	0	0	-0.2541	0.231	-0.0976
At1g53140	0.751	1.1201	1.385	1.3944	0.7898	0.8143	0.3526	1.2996	2.3686	1.1071	2.4582	-0.8217	-0.987	-0.0358
At5g46115	0.6038	1.2689	2.4829	1.1749	0.2843	-1.3235	1.7306	-0.0356	0	0	0	-0.9854	-1.305	-0.3457
At1g14040	-1.3999	-1.582	-1.6667	-1.7864	0.3102	-0.337	-0.6164	-0.7088	1.8805	-1.0018	-1.2593	-0.0375	-0.3383	0.0506
At3g50400	-1.5234	-1.144	-0.6553	-1.426	0.262	-0.8382	-0.1113	-0.1011	-0.1658	-1.3787	-0.1639	-0.3429	0.3687	-0.3966
At3g23970	-0.0439	0.9287	0.4967	-0.3243	0.1467	-0.9925	0.2685	-0.1538	1.5346	0.5619	1.8634	0.6948	0.3302	0.1672
At1g13740	0.7276	3.1578	-0.0156	-0.4731	-1.4422	-2.9141	0.5694	-2.0477	-0.1997	-0.1684	-1.2092	-0.9004	-1.9758	-1.0553
At4g30410	1.5042	1.4825	1.4641	-0.1792	-0.2808	-2.1387	0.6061	-0.891	1.2632	-0.3448	1.7463	1.4104	1.5309	2.0418
At1g33080	-1.4226	-0.5766	-0.5899	-0.3068	-0.4287	0.297	-0.7303	-0.1559	-0.1136	0.1594	2.0656	0.9597	-0.4835	-0.507
At1g74940	-1.1311	-1.6454	-2.0181	-0.8477	-1.4105	-0.7132	-1.6599	-0.8174	-0.6665	-0.5748	-2.2383	1.3594	0.8743	1.6297
At4g09340	0.6248	0.7228	0.7005	0.6318	0.1224	0.0766	0.245	0.1057	-0.2376	0.2323	-0.5848	0.6613	0.602	0.2967
At5g48120	1.1146	1.3944	1.5254	1.7855	0.4645	0.8753	0.234	0.7033	0.717	1.1297	2.0812	-0.0989	-1.2042	-0.8966
At3g19510	0.9649	1.215	1.2652	1.2135	0.6412	0.3741	0.2451	0.5225	0.9315	0.9582	1.626	-0.4294	-0.5732	-0.5196
At3g56170	0.4381	-0.2055	-1.8617	-1.1989	-0.6188	0.2506	-0.5893	-0.3107	0.7538	-0.3895	-0.8928	-1.331	-0.8936	-0.4833
At2g31870	-0.3186	0.4286	0.981	0.5388	0.3183	0.0891	0.489	-0.0692	0.9329	0.2312	0.9244	-0.0093	-0.5725	-0.6596
At5g58970	0.1125	0.09	0.5927	0.5851	0.2035	-0.0146	0.2024	0.6165	11	0	0.152	0.2973	0.3472	0.2645
At5g54540	-0.1694	-0.5565	-0.7079	-0.9023	-0.174	-0.435	-0.3036	-0.74	-1.3424	-1.2025	-1.7933	0.2	-0.655	-0.4349
At1g61310	0.4881	0.7351	0.4724	0.6654	0.2183	0.5401	-0.1231	0.1689	-2.1489	0.2555	1.0839	-0.4364	-0.776	-0.1143
At1g54840	0.927	1.464	1.2366	1.4496	0.3432	0.727	-0.4663	1.2741	2.7142	1.3057	2.6735	0.1501	-1.1147	-0.2757
At2g44650	0.5623	0.2789	0.4242	0.5637	-0.1779	-0.5085	-0.204	0.3214	-0.7047	0.3959	-0.3196	0.0747	-0.1686	-0.018
At1g78020	-1.7759	-1.9237	-3.5518	-4.6264	-1.5875	-3.4447	-2.2972	-3.8936	-2.4313	-1.8495	-3.0285	0.2089	-0.5088	-0.7193
At5g42690	-2.4857	-2.5036	-2.6169	-1.4372	-0.4263	0.3814	-0.63	-1.0254	0.2137	-0.6766	1.7748	1.2028	-0.9363	-0.5765
At2g36480	0.3689	0.5584	0.5669	0.5483	0.0958	0.0006	0.3275	0.5098	0.2655	0.2977	0.3721	-0.4098	-0.5197	-0.8225
At1g04730	0.4496	1.1566	1.0337	1.0057	0.6514	0.5094	0.4499	1.4255	2.3746	1.5361	2.2508	0.6055	0.2421	-0.3122
At1g10200	-0.7415	-0.5361	-0.3283	-0.3033	-0.495	-0.766	-0.6058	-0.8099	-0.3633	0.1834	-0.0214	-0.7412	-1.6671	-1.0232
At2g24090	0.5829	0.5607	0.7524	0.9902	-0.566	-0.852	-0.423	-0.2516	-2.0289	0.2938	-1.388	0.2387	-0.2649	0.3384
At5g24470	0.23	-0.3613	-0.6578	-0.7013	-0.855	-0.6377	-0.8103	-1.0096	-0.0778	-0.1692	-1.2336	0.5885	-0.0918	-1.3983
At2g28450	1.5172	1.5855	1.6086	1.6701	0.3829	0.335	-0.0109	0.1884	1.3974	0.9246	2.4062	-0.4374	-0.9386	-0.6737
At3g19360	0.5283	0.53	1.061	1.0094	0.2053	0.1673	0.6371	0.9906	1.4438	0.6185	1.8649	-0.1804	0.4038	0.0638
At2g01290	0.7963	1.639	1.4403	1.3073	0.2721	-0.2307	0.5024	0.7748	-0.5137	1.0584	-0.7604	-0.3821	-0.2713	-0.6095
At4g20450	-1.3421	-1.2729	-1.7962	-2.267	0.1663	-1.2399	0.5337	-0.7111	0.5189	-0.0473	0.8682	-0.3659	-1.506	-1.0402
At5g27570	3.063	2.215	0.1312	2.9475	-0.3344	0.6604	0.2016	4.1699	0	0	0	1.3905	1.9411	0.079
At4g10920	0.8897	0.8444	0.9055	1.01	0.7409	0.583	0.3736	0.3191	-2.5929	-0.4058	-2.0909	-0.7427	-0.7565	-1.2534
At1g20640	-0.0859	0.371	-0.4851	-0.3154	0.2519	0.377	-0.1708	0.1049	0.4437	-0.5182	0.6191	0.9264	0.1026	-0.0895
At3g62440	-0.2407	-0.6781	-1.4072	-2.4713	-1.6313	-2.9835	-0.353	-1.574	-0.0395	-0.4253	-0.2854	-0.4843	-2.1967	0.4325
At2g15790	-0.6763	-0.0137	-0.9237	0.0081	-0.6558	0.6726	0.1337	1.2674	0.9863	0.0657	2.0622	-0.1523	-0.6106	-0.1665
At5g52660	-0.2948	-0.1402	-0.4366	-0.0611	-0.4663	0.7543	-0.1068	0.1539	-0.3949	0.0397	-0.7881	-0.1384	-1.0641	-0.1626
At5g38450	-1.6463	-0.2246	-1.4708	-1.6382	-1.2349	-1.4586	-0.8845	-1.4931	-0.0577	-0.5316	-1.1767	0.5983	-1.1722	-2.555
At3g12020	0.0284	0.1753	-0.645	-0.3766	-0.3445	-0.5939	-0.0468	-0.1724	-1.4635	0.0203	-1.1585	-0.4012	0.1043	-0.8215
At2g23220	0.3833	-0.4647	1.3672	0.0412	-0.5687	-1.8389	0.3724	-0.154	0	-0.1375	-0.1312	-0.2447	0.2379	-0.044
At1g48950	0.7171	0.7361	0.8037	0.8647	0.2429	0.2999	-0.135	0.1549	1.1035	0.9658	2.0254	-0.1164	0.2385	-0.3078
At3g13228	0.9626	1.6094	0.5059	0.261	-0.9582	-1.0013	0.6894	-1.038	-0.4103	-0.0687	-0.1905	1.2596	-0.2955	0.2232
At1g10050	-0.2743	-0.1371	-0.236	-0.2272	0.2209	0.5429	-0.09	0.0533	0.4067	-0.1911	1.1073	-0.449	0.2493	0.8837
At3g21640	0.1644	0.154	0.5018	0.3576	0.4276	0.2373	0.0124	0.0309	-2.2843	0.2607	-1.5099	0.5559	0.1328	-0.3429
At4g11300	-1.2061	-1.2979	-1.2416	-1.3181	0.1962	-0.0556	0.0856	0.0484	-1.3305	-1.5463	0.1716	-0.3608	-0.1022	0.2168
At1g65310	-5.793	-6.2512	-7.2654	-7.6965	-1.6625	-1.4118	0.5945	0.178	0.3786	-2.8185	2.0884	-0.4055	-1.1486	0.1481
At2g40750	-3.8055	-3.0437	0.726	-0.0955	3.0924	5.0348	4.7168	4.3577	0.1137	-0.4561	-2.2585	-0.2841	-0.0461	0.5585
At4g25410	0.2822	0.6981	0.3089	0.1598	-1.2288	-0.9269	-0.4279	0.3643	0.2115	0.377	0.8002	0.4897	-1.2456	-1.4268
At1g48750	0.2838	0.2624	0.4063	0.1342	3.0563	3.2629	2.1166	1.89	1.3626	1.1155	0.4525	0.3726	-0.0804	0.0767
At5g16270	0.5276	0.3428	0.6802	0.6903	0.1642	0.3836	-0.0076	0.1864	0.1695	0.2897	0.1448	-0.5349	-0.9256	-0.3683
At4g16990	0.8145	-0.3851	1.0225	0.9949	1.2399	-0.821	-0.2397	2.0995	0	0	0	1.3331	0.4267	-0.2924
At3g19680	-0.0258	-0.3741	-1.0128	-0.2454	-0.4149	0.5697	-0.078	0.4348	-0.5741	0.3402	-0.4569	-0.244	0.0607	-0.545
At2g20560	0.7008	1.1717	-0.1363	-0.4334	-0.0003	0.6342	-0.325	-0.347	11	-0.4854	0.263	-1.4866	2.5144	2.9396
At3g47750	0.9626	1.6094	0.5059	0.261	-0.9582	-1.0013	0.6894	-1.038	-0.4103	-0.0687	-0.1905	1.2596	-0.2955	0.2232
At5g11160	2.4318	3.315	2.5432	3.0181	-1.3686	-0.0407	-0.5516	1.2074	2.6839	2.4661	2.8991	-0.0054	0.7435	-0.3997
At3g13610	-0.4994	-2.0061	-0.2559	-1.6821	1.1005	0.4591	3.4015	0.8104	0.9331	-2.2258	2.5233	1.5044	0.655	1.333
At2g20270	-0.074	0.015	0.0305	-0.1118	0.0914	-0.3812	-0.1085	0.0172	-0.9623	0.0649	-0.2116	0.2324	0.3827	-0.0867
At2g47390	-0.4511	-0.6776	-0.558	-0.5568	-0.2566	-0.6271	-0.051	-0.1716	-0.1588	-0.2415	-0.278	-0.1286	0.3405	-0.0093
At3g48780	0.5727	0.3966	0.2264	0.5157	-0.3586	0.1642	-0.2121	0.1727	-0.1468	2.1155	-0.6215	0.0041	-0.4243	-0.4179
At2g41140	-0.036	0.1635	0.0224	-0.1694	-0.0008	-0.4063	-0.4324	-0.1055	-0.98	0.0196	-1.258	-1.417	-1.2025	-0.0739
At2g02000	-1.2761	-1.826	-0.2577	-1.6881	3.1308	0.648	1.3938	0.6544	-0.6136	0.7304	2.8733	1.021	0.7519	1.4844
At2g44950	-0.6668	0.0162	-1.3212	-0.3555	-0.7669	-0.0129	-0.7996	0.4632	0.1178	0.461	0.5605	0.2501	-1.1258	-0.3257
At5g65420	-0.5339	0.1544	0.2641	0.4844	-0.2122	-0.3806	-0.4297	0.6887	3.016	0.7446	2.7444	0.0365	0.0131	-0.335
At2g22540	0.7478	1.2498	-0.7909	1.1856	-2.1568	-0.1788	-2.4116	-0.925	-1.3797	0.0731	0.996	-1.4975	-2.9004	-2.8703
At5g14620	1.1296	1.1017	0.9627	1.0718	-0.011	0.2533	-0.2831	0.0479	0.8308	0.7553	0.9265	0.0259	-0.4766	-0.6821
At3g15950	0.5059	0.0551	-0.8454	-0.4293	-1.4766	-0.9579	-1.0364	-0.6615	2.1178	-0.52	2.7599	0.4092	0.7476	0.8323
At4g32105	-0.4467	0.242	-0.5296	-0.9017	-0.2397	-0.7248	-0.4233	-0.5263	0	0	0	1.0427	-0.5224	-0.1903
At4g27060	0.441	0.7304	0.6399	0.8757	-0.0058	0.3244	-0.0916	0.6157	0.9966	0.3284	1.7764	-0.3346	-0.6877	-0.5538
At1g07650	-0.6677	-0.3677	-0.7583	-0.0945	-0.1718	0.1283	-0.7596	-0.3648	-2.0283	0.4316	0.5412	-0.28	0.08	-0.0091
At4g39270	0.0211	-0.7166	-1.2131	-1.326	0.0528	-0.0314	0.2807	-0.467	1.452	-1.0126	0.0397	0.4401	0.7511	0.7633
At3g18130	0.5873	0.8102	0.8624	0.8942	0.2434	0.2967	0.183	0.5919	2.7686	0.3133	3.6462	-0.9622	0.0546	-0.0594
At5g48300	-0.2471	0.0118	0.7494	1.4339	-0.3434	-0.3377	-0.0644	0.6946	-0.3596	1.7945	1.7395	-1.4957	-0.1529	-0.4352
At3g09370	-0.0611	0.3031	0.0482	0.1767	-0.0012	0.0082	-0.3258	0.2191	-0.0558	0.0452	-0.4939	0.1216	-0.3407	-0.4386
At1g09430	-0.8147	-1.4134	-0.878	-1.2915	-0.3044	-0.7772	0.0347	-0.6479	-1.9922	-1.1815	-1.3222	0.8975	0.3793	0.6327
At3g16857	0.1554	0.088	0.0625	0.3125	0.0652	0.5364	-0.5023	-0.1977	-0.7127	-0.5657	0	-0.1706	-0.3457	-0.3652
At1g22430	0.8359	-0.7338	-1.1225	-2.3706	-1.8188	-4.3198	-0.756	-3.3997	-3.4627	-3.7417	-0.8033	0.5551	-1.8348	0.3947
At1g17130	0.765	0.7253	0.5812	0.6247	0.1673	-0.2263	0.0133	0.3687	0.3266	0.4151	0.3795	-0.0998	0.2789	-0.1819
At2g23090	0.7388	0.5468	0.5578	0.4779	-0.0048	-0.0677	0.1494	0.0895	0	0	0	0.1566	0.6156	0.4247
At1g24180	-0.9949	-0.9065	-0.8258	-0.7193	-0.4668	-0.2511	-0.1669	-0.4832	0.8795	-0.7108	-0.0637	0.7751	0.2661	0.6481
At1g24310	0.8485	1.1351	1.0683	1.1879	0.1099	0.2247	0.1546	0.9405	1.6859	0.968	2.8157	-0.104	-0.2523	-0.0489
At2g18790	-0.1974	-0.3112	-0.3168	0.025	-0.3846	-0.1771	-0.2557	-0.1819	-0.3434	0.5127	1.2696	0.0874	0.1133	0.4735
At5g17510	0.1481	0.9323	0.5755	1.0637	0.1577	0.3855	0.0317	0.626	0.5224	0.807	1.0853	-1.0407	-2.2439	-0.9925
At5g01310	0.0978	0.7351	0.4331	0.4748	-0.1195	0.1162	-0.1054	0.056	0.7599	0.6105	1.119	-0.7754	-0.5703	-1.0126
At1g49210	1.8662	0.6503	1.5456	2.0016	-0.3831	-0.6752	-0.1907	-0.0367	0	0	0	0.9629	-0.6155	1.2322
At2g22470	-1.4316	-1.093	-1.7469	-2.1599	-0.3741	0.2626	0.1842	-1.3726	1.329	-1.0184	1.4559	0.9525	2.5138	2.8331
At3g12490	0.3557	0.147	0.3584	0.5206	-0.031	0.2118	0.0315	0.3236	1.1189	0.9201	0.2349	-0.7347	-0.545	-0.5169
At4g13120	0.392	0.7821	0.9673	1.1077	0.2821	0.3931	0.0369	0.4433	0	0	0	-0.078	-1.2032	-1.206
At2g22420	2.7587	3.7745	4.2184	3.6039	0.7055	0.4527	0.6791	1.1605	3.0737	2.0557	2.8995	-0.962	-0.2947	0.3247
At3g03520	-1.898	-2.1074	-1.1247	-1.7904	-1.0323	-1.7364	-0.601	-2.0898	1.2242	-1.5104	2.022	0.3657	0.1359	2.707
At2g04550	-0.1242	-0.0403	-0.2899	-0.0879	-0.0116	0.2373	-0.1966	-0.1204	-0.4445	-0.2937	-0.7325	0.3095	0.1679	0.171
At1g79090	-0.1746	-0.0935	-0.1241	-0.2527	0.0156	-0.0361	0.1096	0.1602	-0.5831	0.0672	-0.0596	-1.0827	-0.4934	-0.3327
At2g22680	0.2548	-0.8111	-1.558	-0.1106	-1.821	-0.4214	-1.8564	-0.7995	1.2048	0.1336	0.3298	-1.651	-0.9624	-1.0619
At1g54580	-0.0365	0.2394	0.4381	0.1493	0.2828	0.0444	0.0661	0.1189	0	0	0	0.5577	0.8631	0.2674
At5g17660	-0.0088	0.5003	0.4107	0.8968	0.0189	-0.019	-0.1172	0.4796	1.1998	0.823	1.7849	-0.273	-0.7753	-0.688
At2g03190	-0.7258	0.4192	-0.1595	0.0167	0.6229	1.121	0.5663	0.6101	-0.493	-0.2701	0.0291	-0.9982	-0.1153	-0.2901
At1g20860	-0.0953	-0.8233	-1.0271	-0.3327	-0.8842	0.2371	-0.1862	0.7127	0	0	0	1.328	-0.1041	-0.2978
At1g22090	-1.3479	0.2801	-0.7678	-0.5936	-1.4805	1.1549	-3.017	1.3837	0.4981	0.8889	1.9584	0.0653	-0.4032	0.1318
At3g17040	-0.7147	-0.7323	-0.5252	-1.4586	-0.7008	-2.8532	-0.6601	-1.893	-1.7905	-0.4518	-1.2933	-0.9896	-1.6702	-0.4911
At3g45410	-0.5467	-1.4101	-2.6332	-3.972	-0.2511	-1.0186	-0.5463	-3.5526	-0.1854	-2.9094	0.7115	-1.1166	-0.6293	-0.327
At1g49900	-0.6653	0.2455	-1.0771	-0.3741	-0.707	0.0836	-0.5182	0.8872	-0.5025	-0.9249	-0.167	0.523	-0.6338	-1.173
At2g17180	-0.0235	-0.0353	-0.5792	-0.5619	0	-0.0171	-0.2397	0.263	0	-0.2016	-0.9522	0.3249	0.2597	0.5428
At1g18500	0.5607	0.993	0.9442	0.886	0.3857	0.0837	0.4663	0.5567	0	0	0	-0.9498	-0.3948	-0.1895
At5g64080	2.4675	2.9515	3.3492	3.1492	0.1707	-0.1104	1.4274	1.6193	2.2471	1.4088	2.3095	-1.5709	-0.3313	0.3564
At4g12990	-0.3643	0.0464	-0.3458	-0.3112	0.2255	0.0688	0.1276	-0.1997	-1.0914	-0.2486	-0.5438	0.3114	-0.8044	-0.5121
At2g44100	-0.1007	-0.0463	0.2026	-0.1656	0.202	-0.2708	0.4012	-0.082	0.234	-0.3767	-0.3088	0.0866	0.4336	0.4784
At1g18900	0.6394	0.5163	0.7648	0.8156	0.2457	0.4865	0.4483	0.5445	0.3119	0.2542	1.0062	-1.4154	-0.4284	-0.4215
At1g77600	-0.0545	0.9022	0.7536	0.547	0.3774	-0.2092	0.3291	0.0634	0.1519	0.9978	0.7816	-0.7882	-0.6605	-0.6256
At4g02780	-0.2318	1.1142	0.7365	0.0538	0.3004	-0.9916	0.9903	0.532	1.7862	1.4739	2.2443	0.2832	-1.5334	-1.0174
At1g79440	-0.1594	-0.1654	-0.3211	-0.2979	-0.3549	-0.5014	-0.2205	-0.2546	-0.3006	0.1457	1.102	-0.0843	0.3485	0.064
At3g50950	-1.0439	-1.6431	0.1881	-0.5867	1.4118	0.1794	2.0447	0.1098	-0.8464	-0.6365	1.0073	-0.2893	0.0176	0.184
At1g13900	-0.4028	-0.3976	-0.6847	-0.5258	-0.1871	-0.1269	-0.4106	-0.5028	-0.4042	-0.0045	-0.2828	0.7509	0.3111	0.644
At5g05730	0.7223	0.0568	1.6336	1.3526	1.0207	0.8092	1.2927	1.5533	0.512	1.2915	0.6011	-1.1016	-0.3518	-0.2896
At5g40020	-1.1689	-2.4719	-1.4465	-2.0373	-0.3601	0.361	-0.173	-1.1171	3.1756	-0.9641	0.2148	0.1183	-1.7027	-1.1219
At2g13540	0.8977	1.2577	1.3283	1.1613	0.5184	0.1866	0.4303	0.5129	0.7475	0.7743	1.3609	0.0262	0.1755	-0.0344
At5g28470	0.0384	-1.2861	-0.7705	-2.0596	-0.9017	-2.5804	0.7908	-1.7576	0	0	0	0.0445	-1.6972	-1.1844
At4g36730	0.2337	0.4806	0.4109	0.3859	0.0449	0.0685	-0.2966	-0.2704	-0.4528	-0.0555	-0.1749	-0.2423	-0.7908	-0.6657
At1g71691	-0.1373	0.4619	0.0961	-0.2334	-0.1232	-0.4504	-0.0562	-0.2683	0.3833	0.0614	-0.0995	0.7219	0.1989	-0.0441
At3g27920	-0.6215	0.433	-0.4312	0.2224	-1.7434	1.152	0.0163	0.5294	-0.1831	-0.3219	-0.5178	0.5946	0.9045	0.5507
At1g80800	0.97	1.2718	0.8084	1.5296	-0.0527	0.3589	-0.8199	0.1752	0	0	0	-0.8153	-1.2389	-1.0787
At2g35720	-0.0321	0.2563	0.3929	0.1957	0.1791	-0.0641	0.4666	0.0479	0.7937	0.5313	1.4988	-0.0229	0.6879	0.2475
At4g16720	0.4364	0.5216	0.5305	0.522	0.0899	0.1564	0.0826	0.2491	1.3849	0.2521	1.7052	0.044	0.1295	-0.1842
At1g59790	-0.8549	-0.0092	-0.3174	-1.1432	0.697	-0.4335	0.1807	-0.0508	0	0	0	-0.2966	-0.6212	-0.0897
At1g08135	-0.3287	-0.1718	0.0574	0.1993	0.1545	0.1315	0.3473	-0.0455	0.0825	-1	-2.7982	0.8429	1.018	-0.065
At2g33030	1.737	3.9696	3.121	4.1511	0.115	0.8831	-0.137	2.6486	0.4361	-0.4232	-0.6714	-1.3745	0.9448	0.2213
At2g33420	-0.9402	0.7141	-0.4191	-1.0573	0.4728	0.2369	0.144	-0.7496	0.0332	-0.585	-3.5826	-0.9445	-1.1389	-0.3429
At4g00180	-0.7468	0.7284	0.1193	-0.3225	0.0915	-0.8775	-0.1216	-0.8817	-2.8368	-0.1169	-2.6672	-0.0071	-0.5004	-0.7218
At2g27530	0.5069	0.5413	0.5846	0.7033	0.1493	0.244	0.026	0.3558	1.8954	0.4776	2.8971	0.0185	0.1441	-0.2257
At4g28220	0.8841	1.0885	1.2425	1.4821	0.2954	0.53	-0.1596	0.536	1.2299	0.9034	1.2725	-0.1817	-0.3471	-0.0519
At5g53770	0.8987	1.2256	1.7399	1.5922	0.6196	0.4104	0.524	0.8015	1.4162	1.1863	2.2386	-1.3369	-0.724	-1.2977
At1g63280	-0.1203	-1.8043	-3.1104	-1.0652	-2.0704	-1.2014	-2.7809	1.718	-0.8745	0.7004	-0.8845	0.5969	-0.2987	0.2074
At5g06410	0.208	0.2725	0.1251	0.1605	-0.1574	0.2128	0.1328	0.1869	0.381	0.4657	1.4007	-0.534	0.4587	-0.0072
At3g02260	0.0473	0.3028	0.2303	0.3742	0.0797	0.1086	0.2902	0.3709	-0.3205	0.1542	0.041	-0.0212	-0.4082	-0.3307
At2g41680	0.4337	0.8931	0.5355	0.5264	-0.1822	-0.5521	0.0554	0.2517	-1.468	0.4394	0.0624	-0.2933	-0.4539	-0.3236
At1g76730	-0.465	-0.5228	-1.0969	-0.6871	-1.0648	-1.3884	-0.748	0.334	-2.41	-0.1296	-1.998	-0.447	-0.8328	-0.1058
At2g06260	1.3459	2.1582	0.7109	2.5427	-1.8686	0.2337	-2.0673	0.9128	0	0	0	-0.752	-0.8198	-1.149
At1g59750	-0.0148	0.2136	0.6183	0.1802	0.3257	0.0437	0.6144	-0.3781	-0.374	0.4458	0.9513	0.0552	-0.7219	0.4353
At4g34000	0.2975	0.2146	-0.0382	0.2944	-0.678	-0.1061	-0.628	-0.7624	0.105	-0.5015	2.7516	-0.2691	-0.5364	-0.3669
At1g76870	0.7906	1.4568	0.5879	0.5917	-0.9122	-0.7061	0.6187	0.3171	-0.2187	-0.013	-0.2976	1.8792	1.04	0.0213
At1g65270	-0.0156	-0.035	0.1465	0.051	-0.2095	-0.3184	-0.0279	-0.038	0.0498	-0.1753	0.2846	0.2215	0.0676	0.1322
At4g32040	-0.6701	-0.8085	-0.5299	-0.6288	0.1634	0.3122	0.3943	0.069	-0.9892	-0.8282	0.2604	-0.7297	-0.3824	0.4223
At5g44160	-3.1561	-3.1682	-5.2888	-2.2871	-1.1083	0.58	-3.8712	-1.3684	0.8038	-0.8007	1.3241	-0.2023	0.0663	0.8038
At4g26630	0.5332	0.6675	0.8734	0.4728	0.3006	-0.0316	0.2382	-0.1658	0.4243	0.0279	0.891	0.7209	-0.0186	0.7292
At1g78280	-0.1388	-0.7603	-0.4374	-0.5905	0.0866	-0.0985	0.1832	-0.2967	-0.1858	0.1501	-0.2906	0.1953	0.1132	0.3464
At5g55050	3.2586	2.1958	-0.6229	-1.1993	-1.1925	-0.6779	-0.8961	-1.9097	-0.1453	-1.1765	-0.8334	1.2495	0.5036	0.8548
At5g02790	-0.2487	-0.3106	-0.3081	-0.6888	-0.1861	-1.1958	0.1092	-0.5586	-1.9252	-0.1114	-2.3122	-0.6725	-0.3583	-1.9975
At5g44580	0.0933	-0.0245	1.2279	1.6581	1.6281	1.6261	1.3303	1.7977	-1.6572	-0.204	0.464	-0.5873	-1.1568	-1.3671
At1g02670	1.137	0.9295	1.5197	1.7595	1.6252	0.9209	-0.0733	2.4245	1.0042	1.0284	-0.1876	-1.3426	-0.2808	-0.7291
At5g66330	-1.8875	-0.2679	-0.3663	-0.1066	-0.2363	-0.184	-0.6252	0.1493	1.2097	-0.0351	-0.6771	0.3904	-0.4173	0.2034
At3g59580	3.1898	4.2775	3.929	4.5925	1.0604	1.6787	0.327	0.7888	-1.1375	-0.387	-0.6674	0.6358	0.5261	0.4973
At1g06320	-2.2955	-1.0511	-1.347	-1.6908	-0.3348	-0.5099	0.0653	-1.0819	0	0	0	-0.2922	-2.3935	-2.3994
At2g33250	-0.1284	-0.4565	-0.1482	-0.4945	-0.4603	-1.2021	0.0646	-1.0375	0	0	0	-0.5617	-1.0564	-0.0489
At4g25090	-3.4532	-5.0089	-6.6425	-5.9328	-1.468	-1.0802	-4.4527	-5.5772	0.4448	-2.6717	0.7943	-1.0059	-0.4582	0.4017
At4g32930	0.4585	0.4089	0.7542	0.5367	0.2493	0.0366	0.1654	0.1141	0.2563	0.0945	-0.1578	-0.0494	-0.0439	0.0288
At5g23710	0.4464	0.4444	0.1767	0.2654	0.1126	0.1518	-0.0465	0.2539	0.5619	0.1856	0.4942	-0.2181	-0.3921	-0.508
At1g43690	0.1464	0.2969	0.3062	0.3688	-0.0309	-0.1438	0.1785	0.3149	0.1915	-0.0114	-0.0267	-0.1164	-0.2935	-0.22
At1g33270	0.2807	0.0611	-0.0182	-0.0676	0.1928	0.3763	0.1092	0.0563	-0.5469	0.5795	-0.6023	0.2211	-0.6423	-0.9121
At1g72810	-0.711	-0.4084	-0.4986	-0.6098	-0.5944	-0.6716	-0.3543	-0.2587	-0.6513	-0.1024	1.2299	0.3013	-0.9165	-0.7039
At1g06340	0.6302	2.0521	0.7982	-0.3732	3.1853	-1.2687	1.5458	-0.3192	0.288	0.2152	-0.1926	0.2814	0.7483	1.651
At1g72460	-0.5578	0.8643	0.3007	-0.1104	0.4604	0.1993	0.4306	0.2785	-0.0406	-0.3065	-1.0241	0.1566	0.0817	0.7827
At1g28130	1.2086	1.166	0.4407	0.8343	0.0106	0.555	0.0499	0.6365	2.5426	0.2199	-0.8167	-1.0686	-1.2002	-0.3228
At4g08110	0.6627	1.1103	0.4754	0.928	-0.1637	0.0489	-0.5931	0.2378	0	0	0	-0.2461	-1.4996	-0.9424
At4g33520	1.5019	1.8715	1.9831	1.6106	0.435	-0.0526	1.0166	0.9582	0	0	0	0.0558	-0.3419	-0.6658
At3g25740	1.7388	1.5923	1.4169	0.7649	0.3604	-0.6373	0.6021	0.0988	-1.6055	0.6683	0.9059	-0.3134	-1.1642	-1.5897
At3g25585	-0.3443	-0.543	-0.6686	-0.5688	-0.4957	-0.3094	-0.1439	-0.2498	-0.3334	-0.2481	0.219	0.5046	0.4863	0.1769
At4g37130	0.3673	0.6028	0.6286	0.5382	0.3124	0.1046	0.263	0.4354	0.5527	0.4167	0.6932	0.2407	0.0109	-0.0517
At3g27620	2.1158	2.8856	3.2459	2.9947	1.9178	2.0679	1.4924	1.7055	3.261	-0.3133	2.8867	-0.8772	-1.2135	-1.1992
At5g51750	-0.133	1.422	0.8019	1.3214	-0.2179	1.3329	-1.5144	0.0643	1.8849	1.5621	2.5533	0.8413	-0.6672	-0.3614
At1g73490	1.2002	1.3701	1.7377	1.3825	0.6154	0.2001	0.4768	0.4485	1.1418	0.7719	2.0369	-0.4416	-0.1662	-0.3358
At1g76470	0.8964	1.7554	2.84	2.0444	1.6994	1.5892	3.6569	2.7448	1.4395	-1.8654	1.4469	0.139	-0.8584	-0.5785
At2g47490	-0.0667	-0.3801	-0.4454	-0.868	-0.2423	-0.8839	0.0796	-0.466	-0.2853	-0.5453	-0.3094	0.4138	-0.0682	-0.2548
At1g74420	-0.2624	1.2114	-0.6042	0.5202	-0.1013	0.4722	-0.0785	0.5721	0.8869	2.114	0.6296	1.0486	0.088	0.2709
At1g09330	-0.2995	-0.3589	-0.2555	-0.1821	-0.0741	0.0409	-0.0533	-0.1798	0.2772	0.1405	0.779	0.1673	0.4606	0.0966
At2g35040	1.1811	1.2918	1.4324	1.6203	0.2422	0.4534	0.3443	0.9689	1.1244	1.1095	2.3224	-0.5391	-0.3861	-0.0659
At5g13680	1.0717	1.4662	1.6369	1.6444	0.4914	0.488	0.4319	0.9803	0.8014	0.8684	1.9582	-0.5439	-0.0689	-0.108
At3g20550	1.004	1.1771	1.07	1.0192	0.4727	0.3654	-0.0222	0.0533	-0.2895	0.2115	-0.5146	-1.0943	-0.9441	-1.0752
At5g54770	-1.7917	-1.8552	-2.2625	-2.7023	-1.5912	-3.525	-0.8611	-1.9859	-1.7461	-0.7802	-1.3719	0.5584	-0.3018	-0.7141
At3g27590	-0.2534	0.5424	0.3354	0.7865	-1.2592	0.7768	-0.0965	0.5627	-2.0452	0.0704	-0.6884	-0.5048	-1.3984	-0.6298
At4g24175	0.2799	0.6567	1.0501	0.8052	0.3218	-0.0643	0.5348	0.6667	0.5186	0.8697	2.0156	-0.3652	-0.8028	-0.3084
At1g71760	2.6971	3.2035	3.384	2.9098	0.3949	0.6278	0.5955	1.6921	1.7	0.941	1.3694	-1.961	-0.9726	-1.5783
At1g32500	-0.1599	-0.2187	-0.4843	-0.2101	-0.2622	-0.6227	-0.2793	-0.1869	-1.4387	0.1262	-0.6136	0.0798	0.4215	0.1004
At5g66490	-2.2656	-3.2884	-4.254	-4.5226	-0.6816	-1.7475	-1.8699	-3.3339	-3.2057	-3.7477	-2.0038	-0.9969	-0.8736	0.3274
At1g66250	0.9068	1.6858	2.1638	2.366	1.0966	1.3947	0.4186	1.7347	1.7134	1.4594	2.4439	-1.4572	-1.6437	-1.2087
At5g36880	-0.2426	-0.2705	-0.3825	-0.3137	-0.1997	-0.2821	-0.2801	-0.3467	11	-0.6374	0	-0.1924	-0.1327	0.2115
At5g61960	-0.0882	-0.3423	-0.3972	-0.2347	-0.3103	-0.3591	-0.1793	-0.0755	0.1347	0.1213	-1.8095	0.393	0.1877	0.0633
At2g32540	1.5914	1.1914	-1.3948	-1.2686	-1.6424	-1.8179	-0.0784	-1.4734	-3.5927	0.01	-3.9137	-0.0645	-1.7334	-1.4158
At3g28860	-0.3014	-0.0814	-0.3343	0.8428	-0.6502	0.6804	-1.7075	-0.2766	-0.0066	0.779	1.0325	-0.4789	-0.1515	-0.1618
At2g44970	0.1638	0.0726	-0.0275	0.016	0.0304	-0.098	-0.0899	-0.0191	0	11	-0.152	0.484	-0.0226	0.0064
At4g20290	0.1444	0.8225	-0.0621	-0.38	-0.642	-0.7527	-0.5583	0.0605	-0.4136	-0.5449	-0.8332	0.1189	-0.2058	0.0664
At3g17750	0.0767	0.3004	0.548	0.5337	0.1588	0.1843	0.0346	0.2352	-0.3302	0.3629	-0.2306	0.5963	-0.7976	-0.5425
At1g03070	-0.4319	-0.0623	-0.6193	-0.6543	-0.4454	-0.1092	-0.5504	-0.5008	0.1093	-0.6058	-0.7942	0.2558	-1.1873	-1.212
At1g09320	0.7853	1.4017	0.9402	1.1211	0.11	0.5657	0.1757	0.2949	11	0	11	-0.6906	-1.027	-0.7477
At3g62540	0.7682	1.1116	1.1852	1.3639	0.4656	0.3815	-0.1081	0.4275	0.0832	1.0916	1.8959	-0.1053	-0.4	-0.0691
At3g59460	-0.3081	-0.0966	-0.7628	-0.5492	-0.9252	-0.4606	0.4082	0.0911	0.1763	-0.0636	-0.5123	0.6985	0.3538	-0.6678
At1g70560	-1.4103	-0.4194	0.1116	1.9307	-0.1181	1.8662	-1.9586	0.0985	1.4502	2.0165	1.8224	0.1442	0.3672	0.9829
At2g47400	0.4222	-0.9579	-1.888	-1.5662	-1.8937	-2.449	-0.8735	-1.4041	-2.4375	-1.3275	-2.4315	0.0435	-1.2895	0.0119
At1g20580	0.9003	1.2386	1.1346	0.9818	0.3557	0.4112	0.0766	0.3724	1.4188	0.7046	1.823	-0.537	-0.3329	-0.5053
At5g01730	-1.3623	-0.9301	-1.1967	-1.7188	0.3079	-0.7206	-0.1256	0.3563	-2.3923	-1.7279	-0.1635	0.15	-0.129	-1.017
At5g01150	-0.2314	-0.785	-1.2314	-0.178	0.229	0.3292	-0.2366	1.607	1.0418	-0.1186	0.1635	-0.7007	-0.6394	-0.4046
At1g15040	-0.5697	-2.8738	-2.0545	-3.8224	-0.913	-2.2643	-2.738	-6.2851	-1.0628	-2.6471	-2.8923	0.4925	3.9355	2.8516
At4g18730	0.319	0.5124	0.5553	0.4534	0.1528	0.1199	0.1533	0.2907	2.1596	0.4237	2.791	-0.2	0.0745	-0.3112
At4g12640	-0.5622	-0.0947	-0.2494	-0.1507	-0.2544	0.036	0.0439	0.5505	0.7438	0.7341	1.7248	2.0396	0.6016	1.3609
At5g62290	1.2843	1.3108	1.5804	1.6558	0.6216	0.8736	0.2125	0.6913	1.1188	1.2633	2.2988	-0.7082	-0.5926	-0.7546
At5g01350	0.973	1.4058	1.0311	1.138	0.2673	0.4627	-0.7349	-0.3184	0.3812	0.2092	-0.4884	-0.4653	-0.6873	-1.1493
At5g13610	0.0225	0.5844	0.9159	0.4731	0.5449	-0.0981	0.6089	0.3327	0.4343	0.5634	0.6175	-0.309	0.0687	-0.111
At3g07610	0.8195	0.7826	1.652	1.7143	0.8827	0.9922	1.0949	1.2801	-0.8739	1.1048	0.4465	-1.2029	-0.1903	-0.6838
At3g29280	0.8604	1.2145	1.447	1.7731	0.712	0.8995	-0.2519	0.8644	1.6602	1.4231	1.9402	-0.5232	-0.8712	-0.8572
At1g31970	0.9344	1.1273	1.2069	1.442	0.3841	0.4614	0.1445	0.7659	0.5292	0.8262	1.8645	-0.4572	0.3267	-0.1692
At2g47060	-0.7493	-0.9468	-0.7697	-1.0252	0.0835	-0.0921	0.3549	-0.0006	0.1946	-0.287	0.7236	-0.1868	-0.0254	-0.2068
At2g23840	-0.1462	-0.023	-0.6443	0.5061	-1.0317	-0.3363	-0.9194	1.8522	-3.0499	0.2157	-2.1154	2.5121	1.3945	-0.0685
At5g51880	0.252	0.0979	0.1122	0.0945	-0.1999	0.0544	-0.0644	-0.065	-0.218	-0.0189	-0.5105	-0.0333	0.0621	0.0348
At2g34260	0.6361	0.751	0.8919	0.8479	0.4382	0.4007	0.3851	0.5744	1.4051	0.892	3.1083	-0.799	-0.2353	-0.6717
At5g62190	1.1414	1.2717	1.2126	1.4942	0.1121	0.6943	-0.0645	0.3734	1.9018	0.8364	3.0756	-0.7085	-0.7784	-1.2673
At5g18390	0.491	0.6949	0.5266	0.78	0.0166	0.3064	0.0395	0.2073	-0.1145	0.1693	0.2051	0.551	0.2422	0.5589
At1g09520	0.7218	1.1888	1.0742	1.055	0.5432	0.9861	0.0698	0.428	0.8757	0.8354	1.4075	-0.6145	-0.98	-1.0168
At5g02270	-1.3528	-2.1895	-2.0525	-2.3209	-1.3332	-1.5891	0.0112	-1.2168	1.3092	-0.4103	1.4911	0.8631	1.6399	2.0278
At1g19230	-0.0798	-0.537	-0.6136	-1.1332	0.0558	-0.0193	0.147	-0.3839	2.7379	-0.6673	2.5339	-1.0542	-2.3652	-0.5074
At3g11930	1.2172	0.0447	-1.2022	1.0113	-3.3936	-1.7086	-2.0321	-0.2923	-2.1615	-1.1041	-2.8188	1.846	1.594	1.826
At3g52070	-1.0091	-1.4754	-1.8879	-1.494	-1.5628	-1.621	-1.6495	-2.2513	-3.1794	-1.3939	-3.1234	0.875	0.4592	-0.2217
At1g31335	0.2839	1.0387	0.8987	0.1946	0.1243	-0.8839	1.0471	0.77	0	0	0	0.0255	-1.1237	-0.1263
At3g57940	0.5407	0.7132	0.7501	1.1681	0.3053	0.6263	0.0154	1.0213	1.7815	1.247	3.0453	-0.9657	-0.2973	-0.6104
At3g62870	0.5691	0.6785	0.6695	0.7514	0.1649	0.2448	0.0765	0.4145	1.8615	0.6994	2.8723	-0.1337	0.4285	-0.0181
At1g35612	0.0711	1.0607	0.5354	1.2345	-0.6768	0.223	-1.2927	0.0265	0	0	0	-1.4293	-2.2302	-1.4142
At4g37890	0.7982	0.8736	0.1903	0.8227	-0.3876	0.7406	-0.5914	0.0526	2.1324	0.6291	0.4037	-0.7515	-0.2889	-0.0253
At3g08040	0.2043	0.4924	-1.7435	-2.4941	-1.6253	-3.2078	-0.9476	-2.1378	-0.1343	0.0995	-0.5607	0.9021	0.1002	-0.3262
At2g30170	0.5927	1.0256	0.9479	1.2398	0.1716	-0.4648	-0.1653	0.6075	-1.7072	1.0414	-0.1435	-0.5412	-0.9321	-0.4922
At1g52240	0.5828	0.83	0.664	0.6424	0.4541	0.9922	-1.1451	-0.3784	-0.5102	-1.0557	-4.7591	0.049	0.499	-0.7327
At3g15480	-0.9661	-0.5524	-0.6554	-0.5124	-0.4399	-0.145	-0.4192	-0.4445	-0.1463	-0.1744	0.3171	0.2537	0.307	0.058
At1g16290	-0.1882	0.1075	0.1601	-0.136	0.1405	-0.3228	-0.0384	0.0105	2.2554	0.8354	-2.7494	0.7049	0.0805	0.1768
At5g09810	0.1092	0.4972	0.5049	0.3577	0.1512	0.029	0.1442	0.2208	0.852	0.1991	0.1922	-0.5713	-0.1674	-0.1053
At5g48710	0.2382	0.6746	0.6688	-0.3665	0.6968	-1.6885	-0.608	-1.7746	0.5076	0.7347	0.8682	0.6448	0.3437	0.0336
At1g72560	0.253	0.5697	0.4004	0.8434	0.0333	0.3849	0.1377	0.7872	0.4189	0.9339	1.4278	0.1365	0.3991	-0.4837
At5g06330	-0.1187	-0.1981	-0.9594	-0.7643	0.2402	0.2163	0.0759	-0.51	1.8206	-1.4358	2.0238	-1.499	-2.0635	-1.0164
At3g01250	0.6339	2.0247	2.7119	0.6015	0.0307	0.8156	0.8694	-0.3219	-0.3692	0.3744	-5.8152	-0.2974	0.6447	-1.1392
At1g47813	1.5702	1.4363	1.4078	1.6269	0.421	0.5351	-0.4502	0.1424	1.3458	0.6164	2.1074	-0.2594	-0.3726	-0.6897
At5g51440	1.9676	2.9113	0.7018	0.722	0.0504	1.5112	0.2219	1.5198	1.3563	-0.1323	2.291	-0.1278	2.4877	2.6738
At1g70940	1.0592	1.0582	1.1535	1.4126	0.8647	1.2646	0.55	0.8543	0.0686	1.4694	-0.8917	0.6502	-0.2745	-0.2429
At2g25870	0.8899	1.2164	1.2125	1.2176	0.1599	-0.0828	0.4041	0.6961	-0.0212	0.416	0.6519	-0.4471	-0.2404	-0.3945
At4g09540	-0.0847	-0.0956	-0.2582	0.0604	-1.002	0.5066	-1.0444	2.4205	0	0	0	0.6253	0.0475	-0.2546
At5g47770	-0.9863	-0.6759	-0.2851	-0.1754	0.1688	0.2807	-0.5449	-0.3482	1.2261	-0.4263	1.1947	0.6702	0.2688	0.376
At1g69523	-1.5075	-0.8871	-0.9148	-1.4922	-0.4283	-1.3974	-0.7431	0.2615	0	0	0	-1.2404	-1.0949	-0.9068
At3g09720	1.1877	1.6512	1.5235	1.6811	0.1081	0.7043	0.3652	0.9968	2.0834	1.2177	2.5853	-0.6174	-0.0118	-0.2677
At1g78030	0.7218	-0.1268	-2.7446	-0.7332	-1.4454	0.4471	-2.049	-0.27	0	0.737	2.4854	-0.2202	-0.1641	-0.8822
At4g16460	-0.5257	-0.8608	-0.2842	-0.6635	-0.0055	0.8137	-0.7683	0.3274	0.0294	-0.037	-0.2283	0.8552	0.8014	0.7912
At5g33320	-0.1537	-0.0675	0.028	0.368	-0.3078	0.2175	0.1511	0.624	0.5283	0.0366	1.9712	-0.5058	0.1758	0.1499
At1g18530	1.5045	1.4066	2.4255	0.1884	1.8294	0.2224	2.4594	-2.0995	-0.2818	-0.1317	-1.0787	1.0736	0.3768	0.9024
At4g31490	-0.38	-0.1873	-0.0029	0.1908	-0.0425	0.1574	0.0157	0.1837	0.938	0.3064	1.545	0.1855	0.7089	0.316
At2g36620	0.4156	0.6461	0.8408	0.8016	0.392	0.3681	0.1201	0.4234	0	0	0	-0.3767	0.2038	-0.0843
At3g21610	0.1244	0.1543	0.2889	0.1282	0.1549	0.0612	-0.0126	-0.1453	-0.7717	-0.2001	-0.9613	0.3365	-0.1101	-0.1295
At4g08900	-0.032	0.0337	-0.2341	0.0388	-0.3492	0.0776	-0.2581	0.3935	-2.6498	-0.2284	-0.9078	-0.4048	-0.0739	-0.666
At1g80380	0.5509	-0.6407	-1.6583	-1.7664	-0.5097	0.0754	-0.4535	-1.2699	-2.1208	-1.6435	-1.4142	-1.0474	-0.13	-0.8293
At1g60190	-1.5381	-1.7977	-2.2901	-1.9044	-0.0088	0.2388	0.5899	-0.0208	-0.4485	-2.9949	-1.1137	0.8952	-2.0533	-0.7302
At1g08410	0.1664	0.7418	0.8256	1.5519	0.2369	1.2546	0.2237	1.5414	1.9013	1.0771	3.0008	0.2719	0.7389	-0.7057
At5g64710	1.2114	1.8774	2.0602	2.01	0.9693	0.4009	0.543	0.9883	2.4966	1.6617	3.0732	-0.2629	-0.5947	-0.4229
At3g46230	4.0084	2.915	1.4725	0.0822	-2.4784	0.3611	-1.1756	-1.1739	0.1813	-2.7677	0.0145	0.172	2.1004	1.1847
At2g42720	1.0513	1.354	1.7411	1.2923	1.1654	0.4947	0.4881	0.8359	2.3188	0.9347	2.7274	0.7779	-0.3833	-0.0201
At5g53500	-0.1566	0.2788	0.0133	0.8079	0.2648	1.3469	1.0618	0.9815	0.4876	1.324	3.4536	0.4768	-1.4359	-0.4985
At1g70470	0.6371	0.1764	-0.4017	-1.0582	-1.9342	-2.5319	-0.9418	-1.6622	1.0816	-0.3178	1.9807	1.3361	0.2835	0.1696
At1g17920	0.5563	0.1709	0.3064	0.5862	0.2346	0.7947	0.1175	0.5157	1.1351	1.1804	1.1707	-0.1431	0.4973	-0.2335
At5g11510	0.6815	1.5742	1.5569	1.3931	0.2766	0.0559	0.7825	1.4143	2.8477	1.1463	3.3379	-0.8252	-1.0993	-0.3897
At3g50910	1.3627	1.2073	0.7936	0.6718	0.1463	0.1469	0.3401	0.5158	1.0041	0.4589	-0.8034	-0.1748	0.1392	0.0979
At1g28210	0.3076	1.0589	0.7871	0.5879	0.4125	0.3668	0.3621	0.3615	0	0	0	-0.5805	-0.4305	-0.9674
At5g04140	-1.0179	-0.6089	-0.7836	-2.1391	-1.0987	-4.0931	0.1526	-2.1489	-3.4155	-0.9857	-3.0671	1.0662	0.7738	1.2635
At4g38600	0.4361	0.5747	0.1763	0.4658	-0.1313	0.2034	0.4186	0.7015	-1.0995	-0.4854	0.2224	0.2358	-0.884	-0.2663
At3g24060	0.3438	-0.5088	-0.9047	-0.0591	-0.3456	-0.006	-1.8606	-1.4412	0.0242	-0.5178	-0.1186	0.4751	1.1735	-0.5511
At4g34730	0.4188	0.0187	0.1809	0.5132	-0.4188	-0.1307	0.0642	0.3439	-0.9136	0.6709	0.1747	1.6193	1.6536	1.257
At5g45750	0.0241	0.3166	0.8268	0.8288	0.2115	0.1517	0.3894	0.6763	1.5042	0.6562	1.7544	0.1145	0.4395	-0.1903
At3g61460	-0.9182	-0.7771	-0.7493	-0.7009	-0.7823	-0.6429	-0.4617	-1.0814	-1.0144	-0.2015	-2.9374	0.5815	-0.0501	-0.1788
At3g53020	0.5265	0.6053	0.6235	0.6107	0.1782	0.1642	0.0723	0.3217	2.2732	0.3488	2.4955	-0.2699	0.3966	0.0113
At3g15380	0.3845	0.9156	0.8364	0.9939	0.2321	0.2799	0.0231	0.4769	0.8004	1.1427	2.2272	-0.0396	-0.1521	-0.4497
At5g63820	0.3603	0.5514	-0.7705	0.0813	-0.1077	-0.8539	0.0039	1.095	-0.4945	0.554	0.129	-0.2642	-1.1347	-0.9443
At4g01960	0.4099	0.3394	0.4415	0.3001	0.4763	0.225	0.0558	-0.2936	0.4532	0.4942	0.1847	-0.6379	-0.5568	-1.0203
At4g23820	-0.1278	0.366	0.531	1.1252	0.1768	0.6993	-0.3609	1.5091	-1.5364	0.6942	-3.3411	0.2049	-0.1441	-0.0107
At4g24600	-0.1922	0.3106	0.1725	0.4414	-0.958	0.4854	-0.6045	0.4053	0.4867	0.3397	1.751	1.4524	1.0816	0.1412
At1g12400	0.8279	0.5231	1.0896	0.5781	0.576	-0.2748	0.2078	-0.232	0	0	0	0.5657	0.8526	0.7072
At1g01320	0.4569	0.171	0.1919	0.1339	-0.9346	-1.9821	0.1919	0.0375	-2.1981	0.2071	-2.265	-0.0717	-1.2722	-0.3535
At5g58170	-0.262	0.4906	-0.9776	-0.8736	-0.5391	0.0603	-0.8695	-0.1405	-0.8556	0	-3.5549	0.0788	-0.1185	-0.4914
At3g46610	0.1934	0.0632	0.0106	0.1046	-0.1337	-0.5664	-0.243	0.0426	-1.2117	0.4704	-0.0472	-0.429	-0.5433	-1.4822
At2g40940	-0.1589	-0.2347	0.0912	0.1147	0.3274	0.2822	0.2818	0.1308	0.6428	0.3779	1.6484	0.8571	0.5687	0.4659
At4g26480	-0.3046	-0.3084	-0.4745	-0.2697	-0.6436	-0.3946	-0.4383	-0.3875	0.3943	-0.5952	0.4854	0.4314	-0.3963	-0.345
At2g29300	0.4229	1.6153	0.2981	0.2613	-0.0463	-0.1518	-0.4747	0.9653	-2.5632	-1.2198	-2.7846	0.4389	-0.003	0.4937
At2g45310	-1.5303	-0.5086	-0.9649	-0.1803	-0.4949	0.4159	0.1006	1.5418	1.7719	1.5335	-0.2822	-0.4135	0.3933	-0.2155
At1g17840	2.7028	3.1392	2.8689	3.1678	1.3029	2.5265	0.1584	1.7388	-1.1787	0.949	-1.6674	-0.0294	-1.7114	-0.1357
At1g60140	-0.8677	-1.8321	-1.8111	-1.9956	-0.7362	-0.9358	-1.0388	-1.9178	-2.7146	-2.7061	-2.186	-0.8327	-0.7928	-0.3642
At3g60240	0.6547	0.5974	0.4352	0.6877	0.0295	-0.1183	0.1989	0.7159	0.2324	0.4596	0.3549	-0.0462	-0.2463	0.153
At5g61170	0.3203	0.5418	0.5172	0.6447	0.0119	0.1265	-0.0361	0.3659	2.1185	0.281	2.4693	0.0096	0.1293	-0.2269
At4g13770	-8.9128	-7.4856	-6.9774	-7.095	-0.4689	-4.2346	-3.5761	-4.7797	-3.5789	-2.1225	1.3451	-0.0768	1.3481	0.253
At1g79950	1.0186	1.1896	1.1843	1.3986	0.4671	0.1198	0.0444	0.7887	0.8644	0.5946	1.5393	-0.3587	-0.6373	-1.0427
At1g10150	0.3704	-0.138	0.0952	-0.0904	0.0227	-0.081	-0.0634	-0.5441	-2.2575	-0.96	-2.6968	-0.5198	-0.0905	-0.4946
At1g62090	-1.2107	-1.6027	-1.4575	-1.8981	-1.1783	-0.3626	0.176	-1.6787	0	0	0	0.8527	-1.1448	0.0234
At5g39590	-0.4085	-1.0374	-1.5198	-1.8208	-0.4162	-0.7776	-0.312	-1.1815	-2.6661	-0.9327	-1.3611	0.266	-0.0334	0.3402
At4g02480	0.2767	0.1815	0.1377	0.0633	0.0303	-0.1181	-0.2266	-0.4341	-0.4842	-0.1289	-0.099	0.1828	-0.4379	-0.1258
At3g63020	-0.3234	-0.6247	1.3061	-0.4171	4.1196	-1.3835	3.207	0.565	0.5522	0.2254	-0.1274	-0.3533	-0.7898	-1.302
At1g47890	1.6399	1.2589	1.3164	0.4054	1.1824	0.3329	3.3611	0.9152	1.5352	-0.6258	0.351	1.321	0.8344	1.1057
At1g50140	0.5004	0.5386	0.6246	0.6404	0.3733	0.2405	0.2496	0.3774	0.2964	0.6162	0.7121	-0.4562	0.1394	-0.3405
At5g55560	0.7045	0.4895	0.776	-0.2488	0.3265	-0.5944	1.1126	0.1405	1.2462	0.5331	2.3359	0.2057	0.7708	0.8912
At2g16970	-2.0546	-1.2329	-1.8019	-1.7925	-0.7236	-0.8265	-0.6749	-0.5223	-0.8007	-2.1201	0.5726	0.1577	-1.1678	-1.4225
At5g05590	0.6735	0.9045	0.7375	0.8328	0.2033	0.1689	-0.3735	0.1376	0.6447	0.813	2.2758	-0.1785	-0.7474	-0.9525
At2g23380	0.5911	0.4793	0.7505	1.0128	0.0702	0.4042	0.0556	0.6223	1.8798	0.9364	2.1611	0.0609	-0.6637	-0.4306
At5g11240	0.846	1.2689	1.2022	1.3803	0.5856	0.6671	0.5019	0.9856	1.8716	1.0332	2.8308	-0.1806	-0.295	-0.6539
At5g64790	-1.2157	-0.4695	0.0067	0.5001	0.4374	0.2878	1.1579	0.622	-0.4138	0.0921	-3.4002	0.955	-0.3265	0.2175
At3g13730	-1.7555	-3.04	-3.3079	-1.075	-2.4459	-0.4525	-4.0861	-1.9401	-1.2606	0.5535	2.2208	0.558	1.3199	0.4962
At5g60410	-1.1304	-0.8277	-1.388	-0.519	-0.7038	0.1791	0.732	1.3576	0	0	0	0.7562	-0.2958	-0.6559
At1g09480	0.8333	1.2102	0.6998	1.1445	-0.3412	0.5575	-0.3252	0.3093	-1.601	1.0138	-1.3516	0.0007	-0.812	-1.5168
At1g02100	0.4591	0.2027	-0.1159	0.293	-0.1905	0.2269	-0.26	-0.0511	0	0	0	-0.9373	-0.109	-0.4055
At1g16470	-0.0196	0.0183	0.2013	0.196	0.2854	0.3869	0.209	0.4405	0.7748	0.3412	0.4873	-0.0578	0.5285	0.2184
At1g60995	0.0378	0.2169	0.0327	-0.1338	0.1135	-0.4587	0.1604	-0.3084	0	0	0	0.9193	-0.1409	-0.8438
At5g11260	-0.1755	-0.3397	-0.2274	-0.2868	-0.7237	-0.2291	-0.121	-0.5368	1.3345	0.4055	0.7118	-0.0146	0.1625	0.4497
At5g45710	-0.4896	-0.5529	-0.7676	-0.4789	-0.1512	-0.049	-0.2125	-0.4309	-0.3085	-0.2872	-0.5697	-0.9372	0.1555	0.187
At4g18240	-0.6574	-0.3997	-0.4348	-0.1489	-0.0249	-0.4383	0.0608	0.0367	-1.7392	0.4843	-0.0176	0.5761	-0.0346	-0.0552
At2g32760	-0.0957	0.1081	-0.0092	0.3109	0.0608	0.132	0.0052	0.0878	0	0	0	1.2602	-0.0629	0.1202
At4g17380	-0.3382	0.6536	1.5662	1.8741	1.358	0.9156	-0.4381	2.138	0	0	0	0.8953	1.6023	0.6516
At1g15750	0.5228	0.8293	0.6699	0.9508	0.1801	0.4332	0.2891	0.427	-0.6135	0.0391	-0.1395	-0.5895	-0.588	-0.2887
At4g30540	0.6194	0.4613	2.5245	2.6464	1.5996	1.8969	1.8001	1.8007	-0.628	-0.1561	-0.3943	-0.0578	-0.6498	-0.265
At3g14950	-1.4124	1.2213	-1.4124	0.1867	-2.1979	-0.3688	-1.3049	0.0866	0.1283	-0.5564	-0.241	0.7867	-0.1585	-0.8552
